# Supplementary material
Source: PubMed Central journal article supplement (PMC387324)

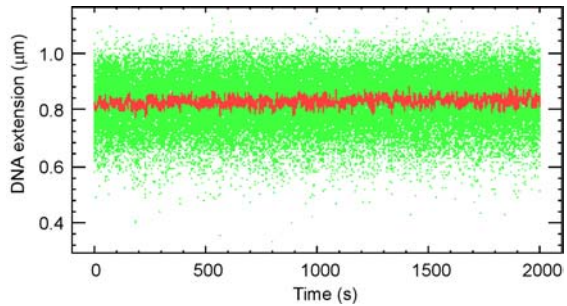

Supplement: pnas_101_14_4776__10.pdf [file pnas_101_14_4776__10.pdf]

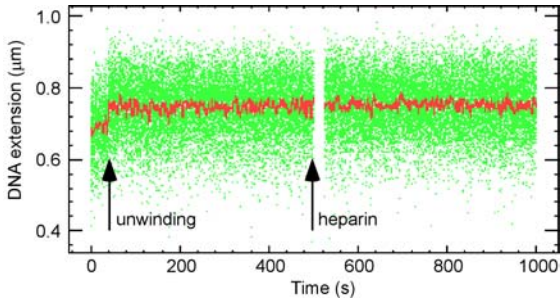

Supplement: pnas_101_14_4776__12.pdf [file pnas_101_14_4776__12.pdf]

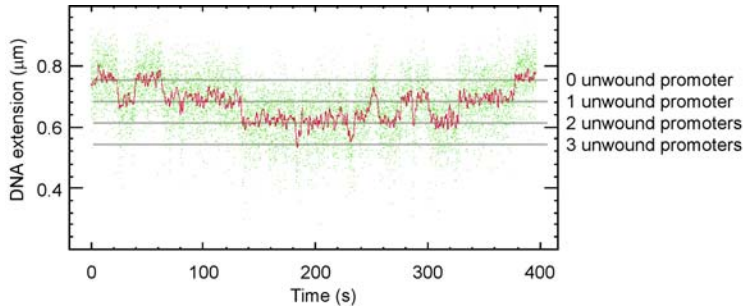

Supplement: pnas_101_14_4776__14.pdf [file pnas_101_14_4776__14.pdf]

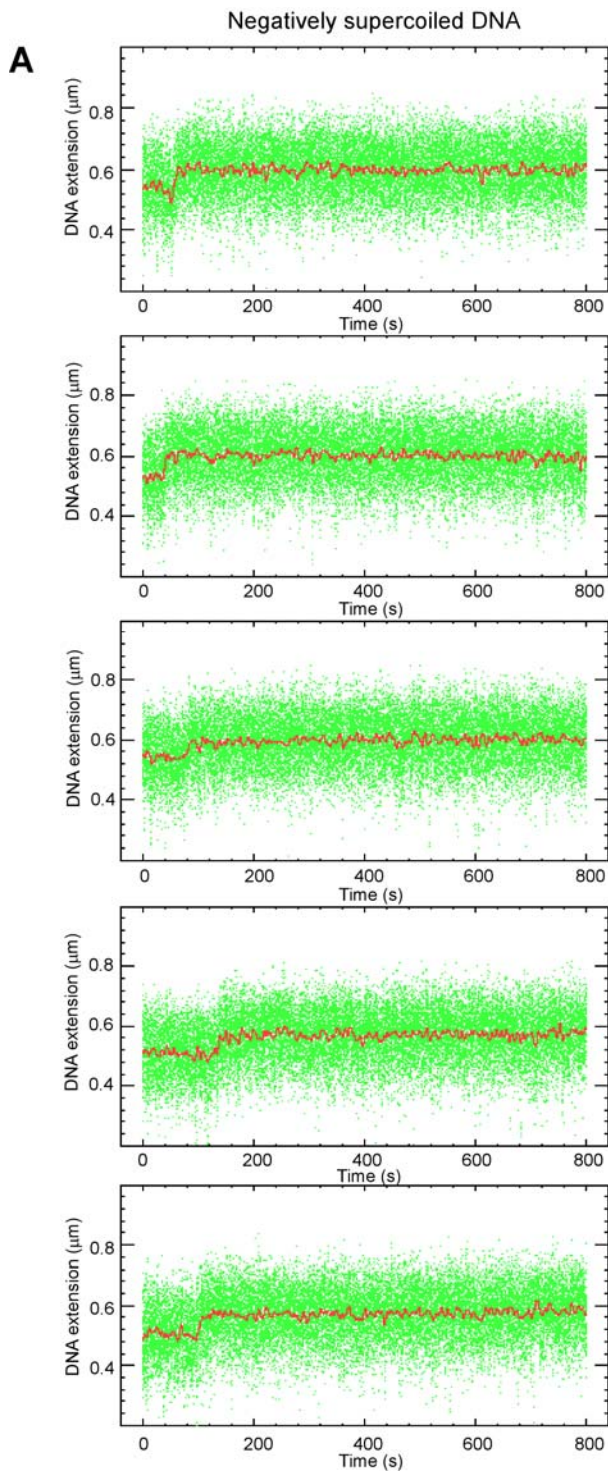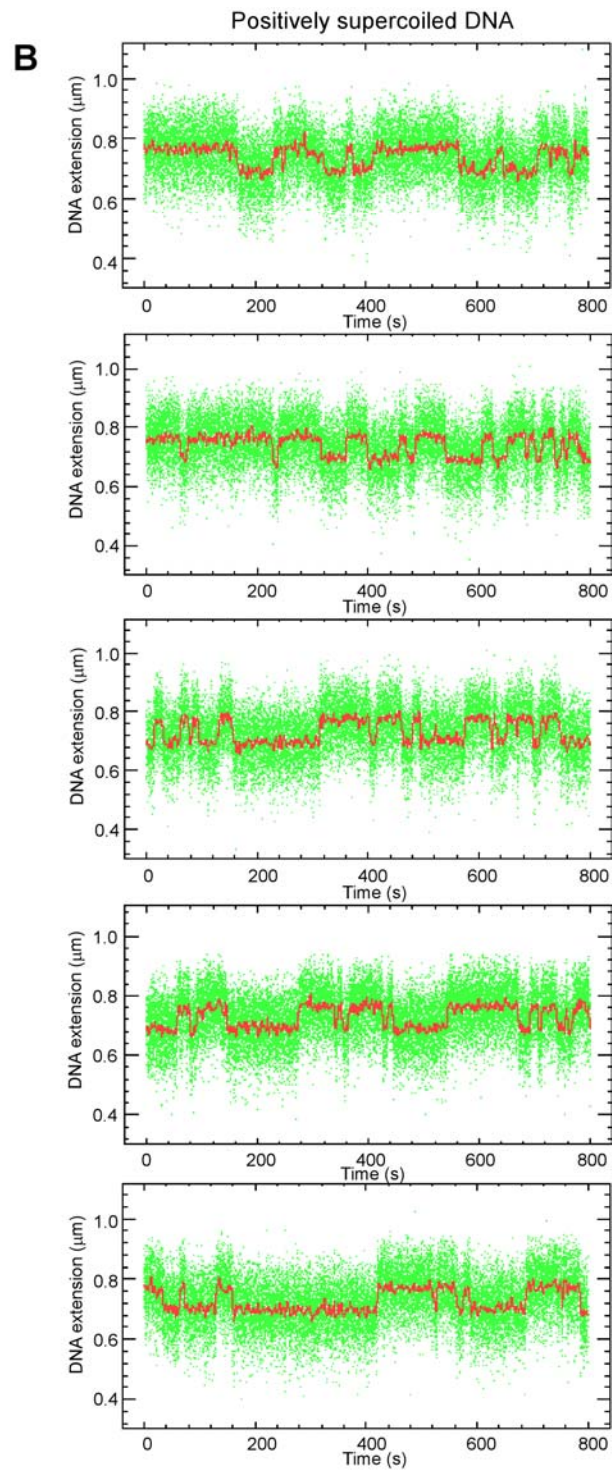

Supplement: pnas_101_14_4776__4.pdf [file pnas_101_14_4776__4.pdf]

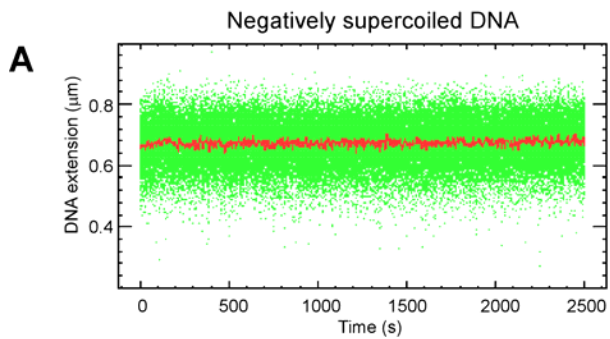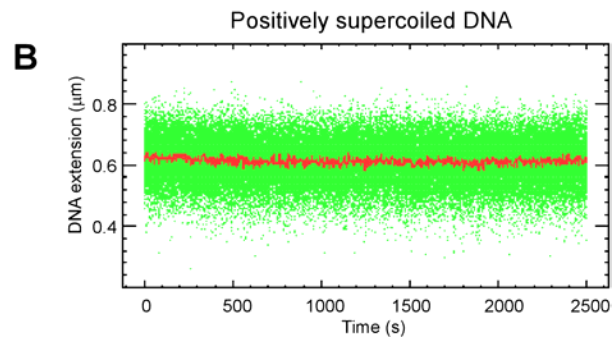

Supplement: pnas_101_14_4776__8.pdf [file pnas_101_14_4776__8.pdf]
